# Supplementary material for: Structural Insights into Methylated DNA Recognition by the Methyl-CpG Binding Domain of MBD6 from Arabidopsis thaliana
Source: PubMed Central journal article supplement (PMC8811898; doi:10.1021/acsomega.1c04917), 2022-01-19
Supplement: ao1c04917_si_001.pdf [file ao1c04917_si_001.pdf]

## Supporting Information

### **Structural insights into methylated DNA recognition by the methyl-CpG binding domain of MBD6 from *Arabidopsis thaliana***

Yutaka Mahana<sup>1</sup>, Izuru Ohki<sup>2</sup>, Erik Walinda<sup>3</sup>, Daichi Morimoto<sup>1</sup>, Kenji Sugase<sup>1</sup>, and Masahiro Shirakawa<sup>1\*</sup>

<sup>1</sup>Department of Molecular Engineering, Kyoto University, Kyoto-Daigaku Katsura, Nishikyo-Ku, Kyoto 615-8510, Japan

<sup>2</sup>Institute for Chemical Research, Kyoto University, Gokasho, Uji, Kyoto 611-0011, Japan

<sup>3</sup>Graduate School of Medicine, Kyoto University, Yoshida Konoe-Cho, Sakyo-Ku, Kyoto 606-8501, Japan

This file includes Supporting Figures S1–S6.

## Supporting Figures

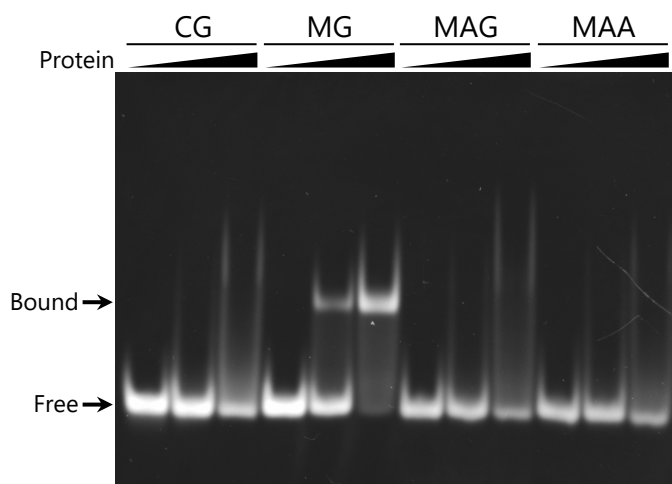

**Figure S1. Gel shift assay of DNA binding by the AtMBD6 MBD domain at different concentrations.** The molar ratios of the protein to DNA in the reactions were 0, 1, 5 for the left, middle, and right lanes, respectively.

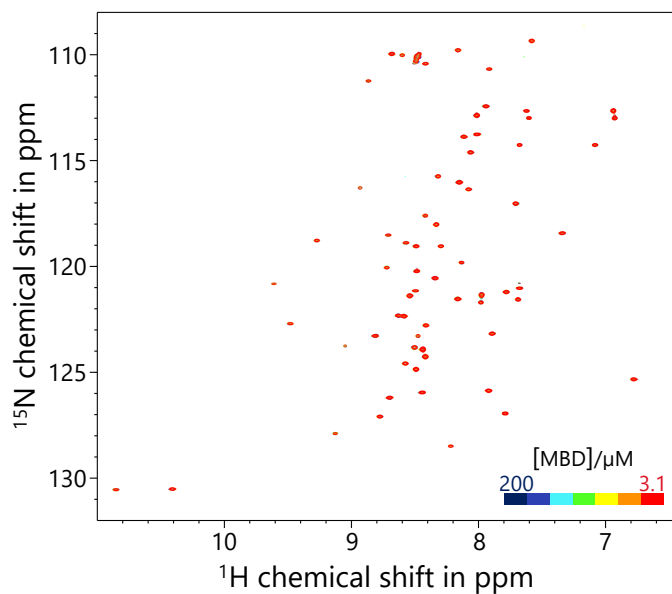

**Figure S2. Comparison of backbone amide chemical shifts of the AtMBD6 MBD domain at different concentrations.** The virtually identical spectra demonstrate that  $\text{MBD}_{\text{AtMBD6}}$  exists as a monomer and is not in a monomer-homodimer equilibrium at micromolar concentrations.

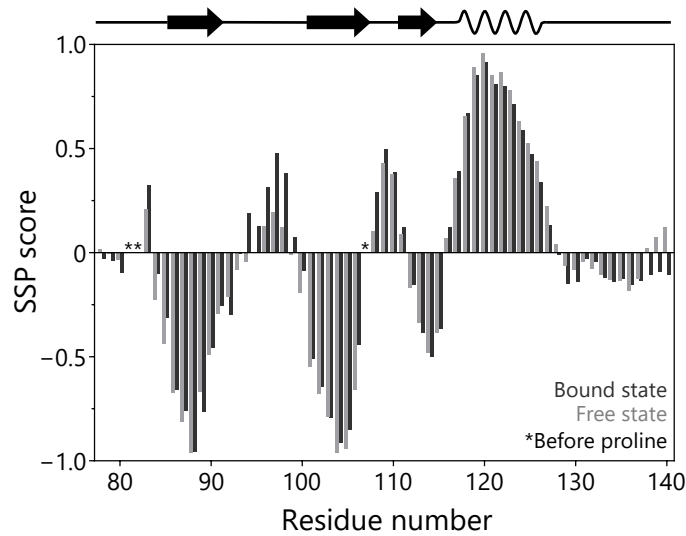

**Figure S3. Comparison of the SSP scores of the AtMBD6 MBD domain in the free and bound states.** The SSP scores of MBD<sub>AtMBD6</sub> in the bound state (black) were calculated by the SSP program. For comparison, the SSP scores in the free state (gray) estimated in our previous study<sup>21</sup> are displayed. Schematic representation of the secondary structure is shown at the top.

|          |         | R               | R           | R            | D          | Y        | R        |          | FBF         |                     |                |            |           |          |        |
|----------|---------|-----------------|-------------|--------------|------------|----------|----------|----------|-------------|---------------------|----------------|------------|-----------|----------|--------|
| AtMBD1   | 107-183 | SRTWIDKPLRPT    | PRGFKRSLIL  | RKDY---      | SKMDAY     | --ITP-   | TGKKLKS  | RNEIAAF  | IDANQDYK--  | YALLGDFNFTVPKVMEE   |                |            |           |          |        |
| AtMBD2   | 115-195 | TRLWAIDKPNISRPP | PAGWQRLLRIR | GEGG-        | TRFADV     | Y--VAP-  | SGKKLRST | VEVQKYL  | NDNSEYIGEGV | KLKLSQFSFQIPKPLQD   |                |            |           |          |        |
| AtMBD3   | 62-140  | TMRWFQDEHSIPKT  | POGLKRVLVV  | RTNC---      | VKVDVY     | ESLAP-   | RRKRFK   | SIKEVATF | IEDKEEFK--  | DMTLEEVSFAAPKRLKL   |                |            |           |          |        |
| AtMBD4   | 80-156  | SRTWIDKPLPKTP   | KGFKRSLVLR  | RKDY---      | SKMDTY     | --FTP-   | TGKKLRS  | RNEIAAF  | VEANPEFR--  | NAPLGDFNFTVPKVMED   |                |            |           |          |        |
| AtMBD5   | 22-104  | KSRKRATPGDDNWL  | PPDWRTEIR   | VRTSGTKAGT   | VDKFY--    | YEPITGR  | KFRSR    | KNEVLYY  | LEHGTPKKK   | SVKTAENGDSHSEHSEGR  |                |            |           |          |        |
| AtMBD6   | 69-149  | KSRKRAAPGD-NWL  | PPGWRVEDK   | IRTSGATAGS   | VDKYY--    | YEPNTGR  | KFRSR    | TEVLYY   | LEHGTSKR-   | GTKKAENTYFNPDHFEQG  |                |            |           |          |        |
| AtMBD7-a | 18-98   | QLQIADPTSF      | CGKIMPGWT   | VVNRPRSSN--  | NGVVDTYE-- | IEPGTGR  | QFSS     | LEAIHRH  | LAGEVNRRL   | TRAGSFFQDKTRVYEGS   |                |            |           |          |        |
| AtMBD7-b | 103-168 | DHCGVEYASKG     | FRLPRGWS    | VEEVPKRN---  | SHYIDKYY-- | VERKTGR  | KFRSL    | VSVERYL  | RESRNSIE    | QQLR-----           |                |            |           |          |        |
| AtMBD7-c | 169-248 | VLQNRGHSKDF     | RLLPDGWI    | VEEKPRRS---  | SSHIDRSY-- | IEPGTGN  | KFRS     | MAAVERY  | LISVGNIT    | LDSVSMVHSERLPLLMNRN |                |            |           |          |        |
| AtMBD8   | 331-412 | KKKVVNACDY      | GGYLRGWR    | LMLYIKR      | KGSNLL     | LACRYY-- | ISP-     | DGQQFET  | CKEVSTY     | LRSLLES             | SPKQHYLLQSDNKT | LGQQP      |           |          |        |
| AtMBD9   | 255-333 | QNLRFISERH      | GVLEDGWR    | VEFRQPLNG--- | YQLCAVY--  | CAP-     | NGKTF    | SSIQEV   | VACYLGLA    | INGNYSCMDA          | EIRNENSLL      | QERL       |           |          |        |
| AtMBD10  | 1-77    | MENTDELVS       | IELPAPAS    | WKKLFY       | PKRAG-     | TPRKTE   | IVF--    | VAP-     | TGEEISS     | RKQLEQYL            | KAHPGNP---     | VISEFEWTT  | GETPRR    |          |        |
| AtMBD11  | 1-77    | MGEEEEVVS       | VELPAP      | SSWKKL       | FYPNK      | VGV-SV   | KKTE     | VVF--    | VAP-        | TGEEIS              | NRKQLEQYL      | KSHPGNP--- | AIAEFDWTT | SGTPRR   |        |
| AtMBD12  | 50-129  | DGTTCDTW        | PSIPIPT     | GWSRS        | VHIRSES--  | TKFADV   | VY--     | FPP-     | SGERLRS     | SAEVQSF             | LDNHPEY        | YREGVNR    | SQFSF     | QIPKPLDD |        |
| AtIDM1   | 239-318 | PRLLYKY         | VCKVLT      | AARWK        | IEKRE      | SAG--    | RKHVD    | TFY--    | ISP-        | EGRKF               | REFGSA         | WALGGILL   | ADRKLMDT  | GTKKWTG  | INDFWS |

**Figure S4. Sequence alignment of the MBD domains in *A. thaliana*.** Identical and homologous residues are colored in black and gray, respectively. The important residues for specific recognition of the methyl-CpG site and formation of the hairpin loop motif conserved among mammalian MBD domains are indicated on the top.

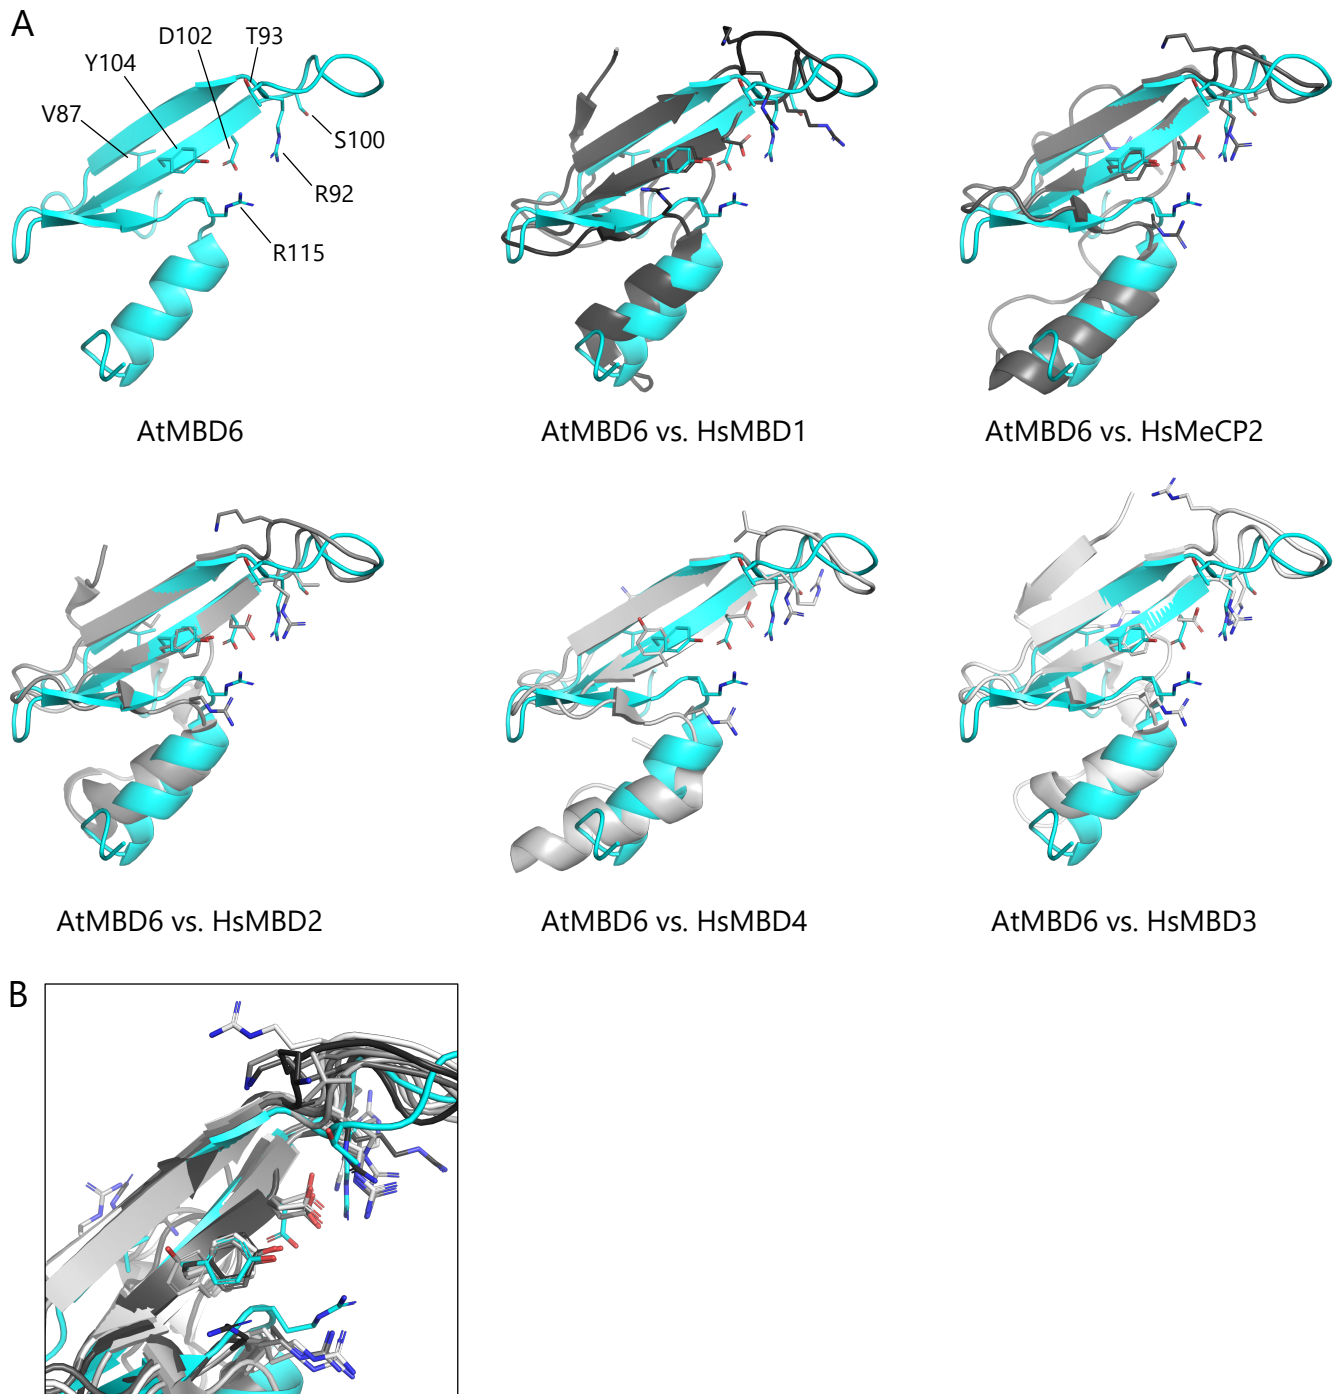

**Figure S5. Structural superposition of the AtMBD6 MBD domain and human MBD domains.** (A) Superposition of the solution structure of MBD<sub>AtMBD6</sub> in the free form (cyan) and the crystal or solution structure of human MBD domains bound to methyl-CpG-containing DNA (gray). DNA moieties are omitted for clarity. Side-chains of important residues marked by asterisks and daggers in Figure 4A are shown as sticks. Protein Data Bank IDs of the human MBD domains shown are: HsMBD1, 1IG4; HsMeCP2, 3C2I; HsMBD2, 6CNQ; HsMBD4, 2MOE; HsMBD3, 6CCG. (B) Superposition of all six MBD domains shown in Figure S5A focusing on the important residues.

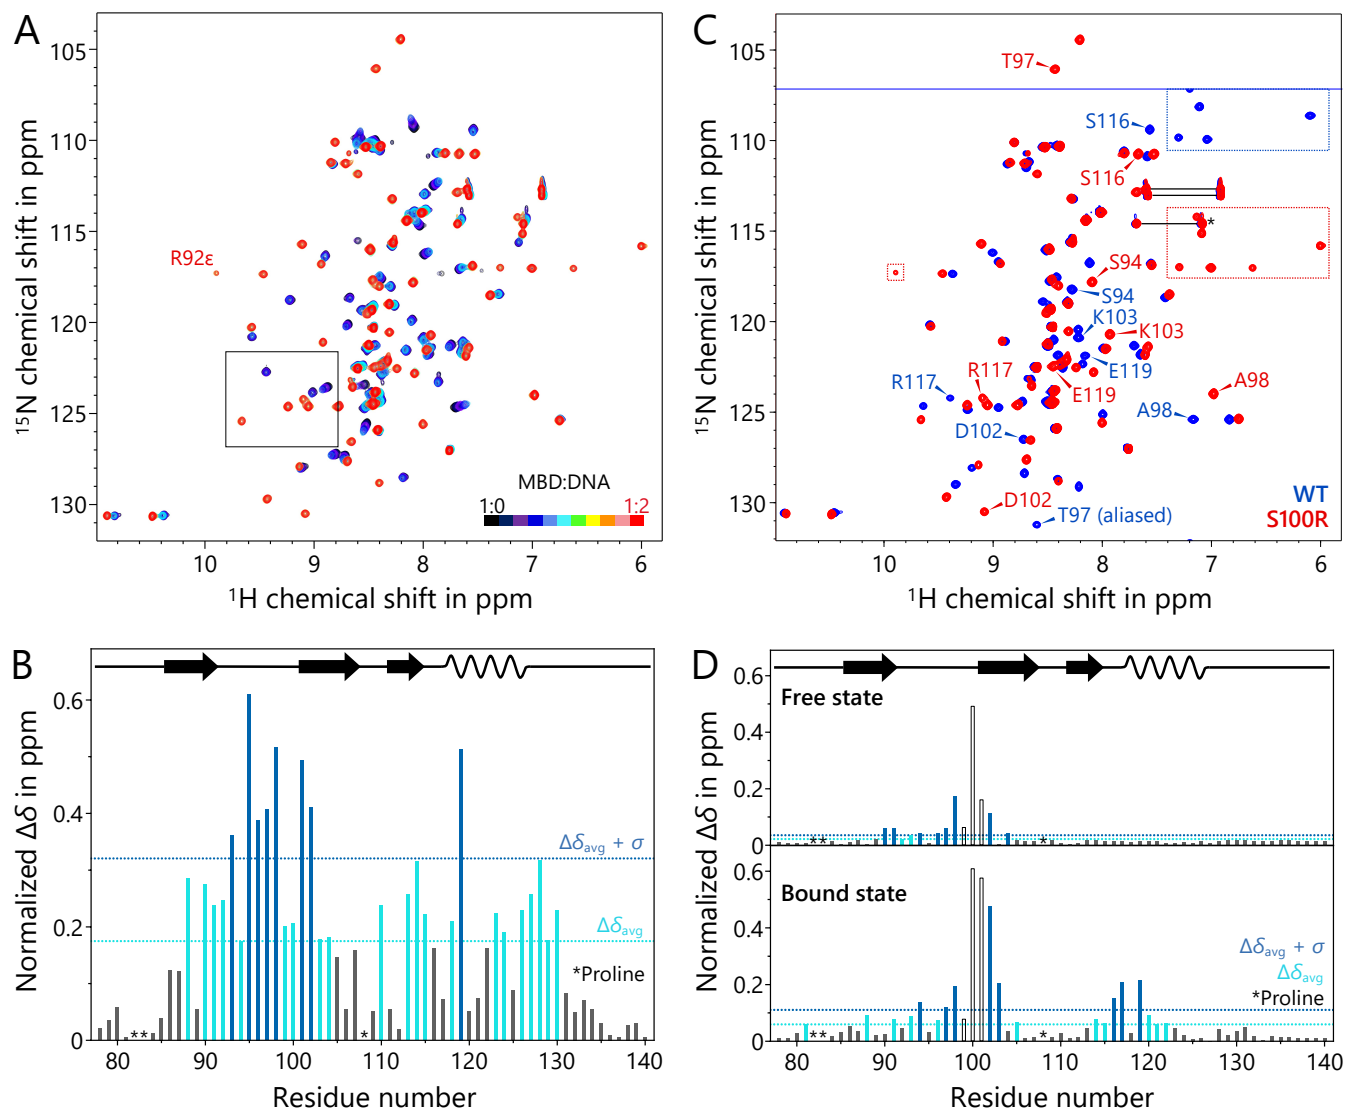

**Figure S6. Binding of the S100R AtMBD6 MBD domain to methyl-CpG-containing DNA.** (A) Overall view of the spectral changes of S100R MBD<sub>AtMBD6</sub> over the course of the titration. The enclosed region corresponds to Figure 4D. (B) Normalized CSD values of S100R MBD<sub>AtMBD6</sub> upon binding toward methyl-CpG-containing DNA. (C) Spectral overlay of WT (blue) and S100R (red) MBD<sub>AtMBD6</sub> bound to methyl-CpG-containing DNA (the molar ratios of the protein to DNA are 1:1.5 and 1:2, respectively). The blue line indicates the spectral border in the  $^{15}\text{N}$  dimension of the spectrum of WT MBD<sub>AtMBD6</sub>. For clarity, only residues showing large CSD values between WT and S100R MBD<sub>AtMBD6</sub> (as marked in blue in Figure S6D, bottom) are annotated. The paired side-chain amide resonances of asparagine and glutamine residues are connected by black horizontal lines. Cross-peaks in the areas surrounded by dashed lines, except for an amide NH<sub>2</sub> signal marked with an asterisk, correspond to aliased side-chain resonances. (D) Comparison of backbone amide chemical shifts between WT MBD<sub>AtMBD6</sub> and the S100R mutant. Residues 99–101 were excluded in the calculation of the average values and the standard deviations.
